# Supplementary material
Source: MDPI journal article supplement (https://www.mdpi.com/1660-4601/11/2/1914)
Supplement: s1 [file s1]

## Global Trade, Local Impacts: Lessons from California on Health Impacts and Environmental Justice Concerns for Residents Living near Freight Rail Yards

**Table S1.** List of rail yards with county and population proportion non-white in the corresponding county.

| <b>Rail yard</b>      | <b>County</b>                         | <b>Proportion non-white in County</b> |
|-----------------------|---------------------------------------|---------------------------------------|
| UP Commerce           | Los Angeles                           | 0.691                                 |
| UP LATC               | Los Angeles                           | 0.691                                 |
| BNSF Sheila           | Los Angeles                           | 0.691                                 |
| BNSF Commerce Eastern | Los Angeles                           | 0.691                                 |
| BNSF Watson           | Los Angeles                           | 0.691                                 |
| BNSF Hobart           | Los Angeles                           | 0.691                                 |
| UP City Of Industry   | Los Angeles                           | 0.691                                 |
| UP ICTF Dolores       | Los Angeles                           | 0.691                                 |
| UP Oakland            | Alameda                               | 0.592                                 |
| UP Colton             | San Bernardino                        | 0.562                                 |
| BNSF Barstow          | San Bernardino                        | 0.562                                 |
| UP Stockton           | San Joaquin                           | 0.528                                 |
| BNSF Stockton         | San Joaquin                           | 0.528                                 |
| BNSF San Bernardino   | San Bernardino/Riverside <sup>1</sup> | 0.528                                 |
| UP Mira Loma          | Riverside                             | 0.491                                 |
| BNSF San Diego        | San Diego                             | 0.451                                 |
| BNSF Richmond         | Contra Costa                          | 0.423                                 |
| UP Roseville          | Placer                                | 0.380                                 |

<sup>1</sup> The 100 in a million risk isopleth for BNSF San Bernardino is located in both San Bernardino and Riverside counties.

**Table S2.** Estimated proportion of African American or Hispanic/Latino residents living in close proximity to rail yards (where proximity is defined by 100 in a million risk isopleth), compared to the corresponding population proportions in the county in which the rail yard is located. The rail yards are listed in decreasing order of population proportion non-white in the County.

| Location              | Proportion African American |                           |              | Proportion Hispanic/Latino |                           |              |
|-----------------------|-----------------------------|---------------------------|--------------|----------------------------|---------------------------|--------------|
|                       | County                      | 100 in a million isopleth |              | County                     | 100 in a million isopleth |              |
|                       |                             | Estimate                  | 95% CI       |                            | Estimate                  | 95% CI       |
| UP Commerce           | 0.094                       | 0.003                     | 0.002, 0.004 | 0.446                      | 0.966                     | 0.963, 0.969 |
| UP LATC               | 0.094                       | 0.209                     | 0.202, 0.216 | 0.446                      | 0.577                     | 0.568, 0.585 |
| BNSF Sheila           | 0.094                       | 0.008                     | 0.002, 0.025 | 0.446                      | 0.894                     | 0.857, 0.922 |
| BNSF Commerce Eastern | 0.094                       | 0.011                     | 0.006, 0.019 | 0.446                      | 0.891                     | 0.871, 0.908 |
| BNSF Watson           | 0.094                       | 0.047                     | 0.036, 0.062 | 0.446                      | 0.943                     | 0.928, 0.956 |
| BNSF Hobart           | 0.094                       | 0.003                     | 0.003, 0.004 | 0.446                      | 0.973                     | 0.972, 0.975 |
| UP City of Industry   | 0.094                       | 0.018                     | 0.015, 0.022 | 0.446                      | 0.829                     | 0.820, 0.839 |
| UP ICTF Dolores       | 0.094                       | 0.164                     | 0.160, 0.168 | 0.446                      | 0.401                     | 0.395, 0.406 |
| UP Oakland            | 0.144                       | 0.639                     | 0.628, 0.649 | 0.190                      | 0.189                     | 0.180, 0.198 |
| UP Colton             | 0.086                       | 0.085                     | 0.083, 0.087 | 0.392                      | 0.666                     | 0.663, 0.669 |
| BNSF Barstow          | 0.086                       | 0.089                     | 0.080, 0.098 | 0.392                      | 0.487                     | 0.472, 0.503 |
| UP Stockton           | 0.063                       | 0.182                     | 0.167, 0.199 | 0.305                      | 0.638                     | 0.617, 0.658 |
| BNSF Stockton         | 0.063                       | 0.108                     | 0.085, 0.136 | 0.305                      | 0.585                     | 0.544, 0.625 |
| BNSF San Bernardino   | 0.074                       | 0.118                     | 0.114, 0.121 | 0.378                      | 0.738                     | 0.734, 0.743 |
| UP Mira Loma *        | 0.060                       | 0.075                     | 0.053, 0.103 | 0.362                      | 0.416                     | 0.372, 0.462 |
| BNSF San Diego        | 0.054                       | 0.175                     | 0.147, 0.206 | 0.267                      | 0.346                     | 0.310, 0.384 |
| BNSF Richmond         | 0.090                       | 0.206                     | 0.178, 0.237 | 0.177                      | 0.535                     | 0.498, 0.572 |
| UP Roseville *        | 0.080                       | 0.020                     | 0.019, 0.021 | 0.149                      | 0.123                     | 0.121, 0.126 |

\* UP Mira Loma and UP Roseville estimates and 95% CI are from 50 in a million isopleths.

**Table S3.** Estimated proportion of low income households (<\$30,000/year) living in close proximity to rail yards (where proximity is defined by 100 in a million risk isopleth), compared to the corresponding population proportions for the county in which the rail yard is located, with the rail yards listed in decreasing order of population proportion non-white in the County.

| Location              | County | 100 in a million isopleth |              |
|-----------------------|--------|---------------------------|--------------|
|                       |        | Estimate                  | 95% CI       |
| UP Commerce           | 0.358  | 0.494                     | 0.476, 0.512 |
| UP LATC               | 0.358  | 0.603                     | 0.579, 0.626 |
| BNSF Sheila           | 0.358  | 0.404                     | 0.312, 0.502 |
| BNSF Commerce Eastern | 0.358  | 0.397                     | 0.345, 0.450 |
| BNSF Watson           | 0.358  | 0.420                     | 0.360, 0.482 |
| BNSF Hobart           | 0.358  | 0.558                     | 0.549, 0.567 |
| UP City of Industry   | 0.358  | 0.281                     | 0.256, 0.307 |
| UP ICTF Dolores       | 0.358  | 0.357                     | 0.347, 0.367 |
| UP Oakland            | 0.258  | 0.656                     | 0.637, 0.674 |
| UP Colton             | 0.349  | 0.422                     | 0.416, 0.429 |
| BNSF Barstow          | 0.349  | 0.628                     | 0.604, 0.652 |
| UP Stockton           | 0.366  | 0.575                     | 0.535, 0.614 |
| BNSF Stockton         | 0.366  | 0.684                     | 0.604, 0.755 |
| BNSF San Bernadino    | 0.346  | 0.587                     | 0.578, 0.597 |
| UP Mira Loma *        | 0.344  | 0.805                     | 0.767, 0.839 |
| BNSF San Diego        | 0.305  | 0.824                     | 0.751, 0.880 |
| BNSF Richmond         | 0.202  | 0.451                     | 0.391, 0.513 |
| UP Roseville *        | 0.308  | 0.214                     | 0.208, 0.220 |

\* UP Mira Loma and UP Roseville estimates and 95% CI are from 50 in a million isopleths.
